# Supplementary material for: Potassium Chloroaurate-Mediated In Vitro Synthesis of Gold Nanoparticles Improved Root Growth by Crosstalk with Sucrose and Nutrient-Dependent Auxin Homeostasis in Arabidopsis thaliana
Source: MDPI journal article supplement (doi:10.3390/nano12122099), 2022-06-18
Supplement: s1 [file s1]

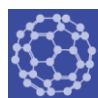

## Supplementary material

# Potassium Chloroaurate-Mediated *In Vitro* Synthesis of Gold Nanoparticles Improved Root Growth by Crosstalk with Sucrose and Nutrient-dependent Auxin Homeostasis in *Arabidopsis thaliana*

Sandeep Yadav<sup>1</sup>, Poli Yugandhar<sup>2</sup>, Hemasundar Alavilli<sup>3</sup>, Ramesh Raliya<sup>4</sup>, Archita Singh<sup>1</sup>, Shivendra V. Sahi<sup>5</sup>, Ananda K. Sarkar<sup>6</sup> and Ajay Jain<sup>7,\*</sup>

<sup>1</sup>National Institute of Plant Genome Research, Aruna Asaf Ali Marg, New Delhi, India; sandeep18887@gmail.com (S.Y.), architasingh0909@gmail.com (A.S.)

<sup>2</sup>ICAR-Indian Institute of Rice Research, Hyderabad, India; poliyugandhar@gmail.com (P.Y.)

<sup>3</sup>Department of Bioresources Engineering, Sejong University, Seoul, Korea; alavilli.sundar@gmail.com (H.A.)

<sup>4</sup>Aerosol and Air Quality Research Laboratory, Department of Energy, Environmental, and Chemical Engineering, Washington University in St. Louis, St. Louis, Missouri, USA; rameshraliya@wustl.edu (R.R.)

<sup>5</sup>University of the Sciences, 600 South 43rd Street, Philadelphia, PA, USA; s.sahi@uscience.edu (S.V.S.)

<sup>6</sup>School of life sciences, Jawaharlal Nehru University, New Delhi, India; anandaksarkar@mail.jnu.ac.in (A.K.S.)

<sup>7</sup>Amity Institute of Biotechnology, Amity University Rajasthan, Jaipur, India.

\* Correspondence: ajain2@jpr.amity.edu

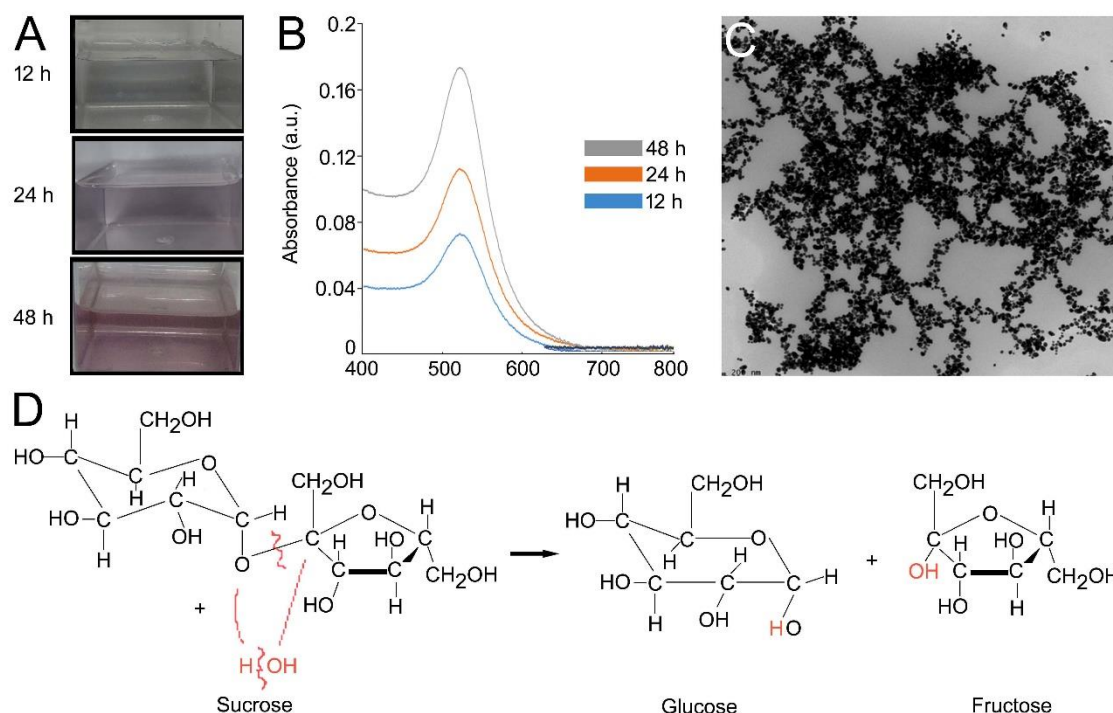

**Figure S1.** Effects of Suc in NR medium on the solution color, UV-vis spectrum, and TEM images during KAuCl<sub>4</sub>-mediated synthesis of AuNPs. NR medium containing Suc was supplemented with KAuCl<sub>4</sub> (100 ppm) and after 12 h, 24 h, and 48 h A) Color and B) UV-vis spectrum was documented. C) TEM images of AuNPs formed in the medium after 48 h. D) Hydrolysis of non-reducing sucrose into reducing glucose and fructose by the process known as ‘inversion of sugar’.

**Table S1.** List of primers used for qRT-PCR.

| <b>Gene</b>  | <b>Locus ID</b> | <b>Primers used for qRT-PCR</b>                            |
|--------------|-----------------|------------------------------------------------------------|
| <i>UBQ5</i>  | At3g62250       | F: AAGGTTTCAGCGTTTGAGGAAG<br>R: GGATCGATCTACCGCTACAACAG    |
| <i>GH3.3</i> | At2g23170       | F: CATCACAGAGTTCCTCACAAGCTC<br>R: GGTGCGCATCAACTTCCTTTCACC |
| <i>IAA6</i>  | At1g52830       | F: TTCGGCTGTCTTGGCATAGGAG<br>R: TTCACGATCCTCAGCCTCTTGC     |
| <i>ASA1</i>  | At5g05730       | F: ATGCATATAAGCTCCACGGTGAC<br>R: GTACGTCCCAGCAAGTCAAACC    |
| <i>ASB1</i>  | At1g25220       | F: ACGAATCCCACAAGAGTTTCCG<br>R: GATTCCGCCATTTCAATCGAAGC    |
| <i>TAA1</i>  | At1g70560       | F: CTTTCACTCTTCCCAAGTACC<br>R: TGCTCATTACCTTGTGTCTCC       |
| <i>YUC9</i>  | At1g04180       | F: AGAGATCAGATTGCATAGCGTC<br>R: CGTTGGGTATTTCAGGGTAGTG     |
| <i>NIT1</i>  | At3g44310       | F: GCATTGTACGCCAAAGGCATTGAG<br>R: GAATTGGCAAGCCGACAAGACG   |
| <i>AUX1</i>  | At2g38120       | F: CAGCTGCGCATCTAACCAAGTG<br>R: GATGAGATAAGCAGTCCAGCTTCC   |
| <i>LAX2</i>  | At2g21050       | F: TCGGTGGACATGCTGTTACTGTAG<br>R: GCACGTAGAGTGTTGCAAACAGG  |
| <i>PILS2</i> | At1g71090       | F: CTCTCTGAAGGACCAAATGA<br>R: CACAATCCCTATTCCTCACTAAC      |
| <i>PILS5</i> | At2g17500       | F: GAGTCTTGTGGGAGCTTTC<br>R: CAAGTGTAACCGTCTGAGCTA         |
| <i>PILS7</i> | At5g65980       | F: CAGTGATTGTGGGAGTGATAAT<br>R: GAGGGTCTGGAGGAAGATAG       |
| <i>ARF6</i>  | At1g30330       | F: CTCGAAGGCCAATTAGAAGA<br>R: ACGTCGTTCTCTCGGTCAAC         |
| <i>ARF8</i>  | At5g37020       | F: TTGGGCGTTCATTAGACAT<br>R: GTCATCACCAAGGAGAAGAATA        |
